# Supplementary material for: Short and sweet: balancing energy savings and cleaning performance to identify efficient short-cycles for domestic dishwashers
Source: publisher site journal article supplement (doi:10.1515/tsd-2024-2589), 2024-07-08

**Supplementary data S2: Temperature curve of the programmed average Eco-cycle measured with 13 place settings according to IEC 60436 and the test setup load (6 dinner plates, 2 cups, 1 mug, 11 CFT-tiles).**


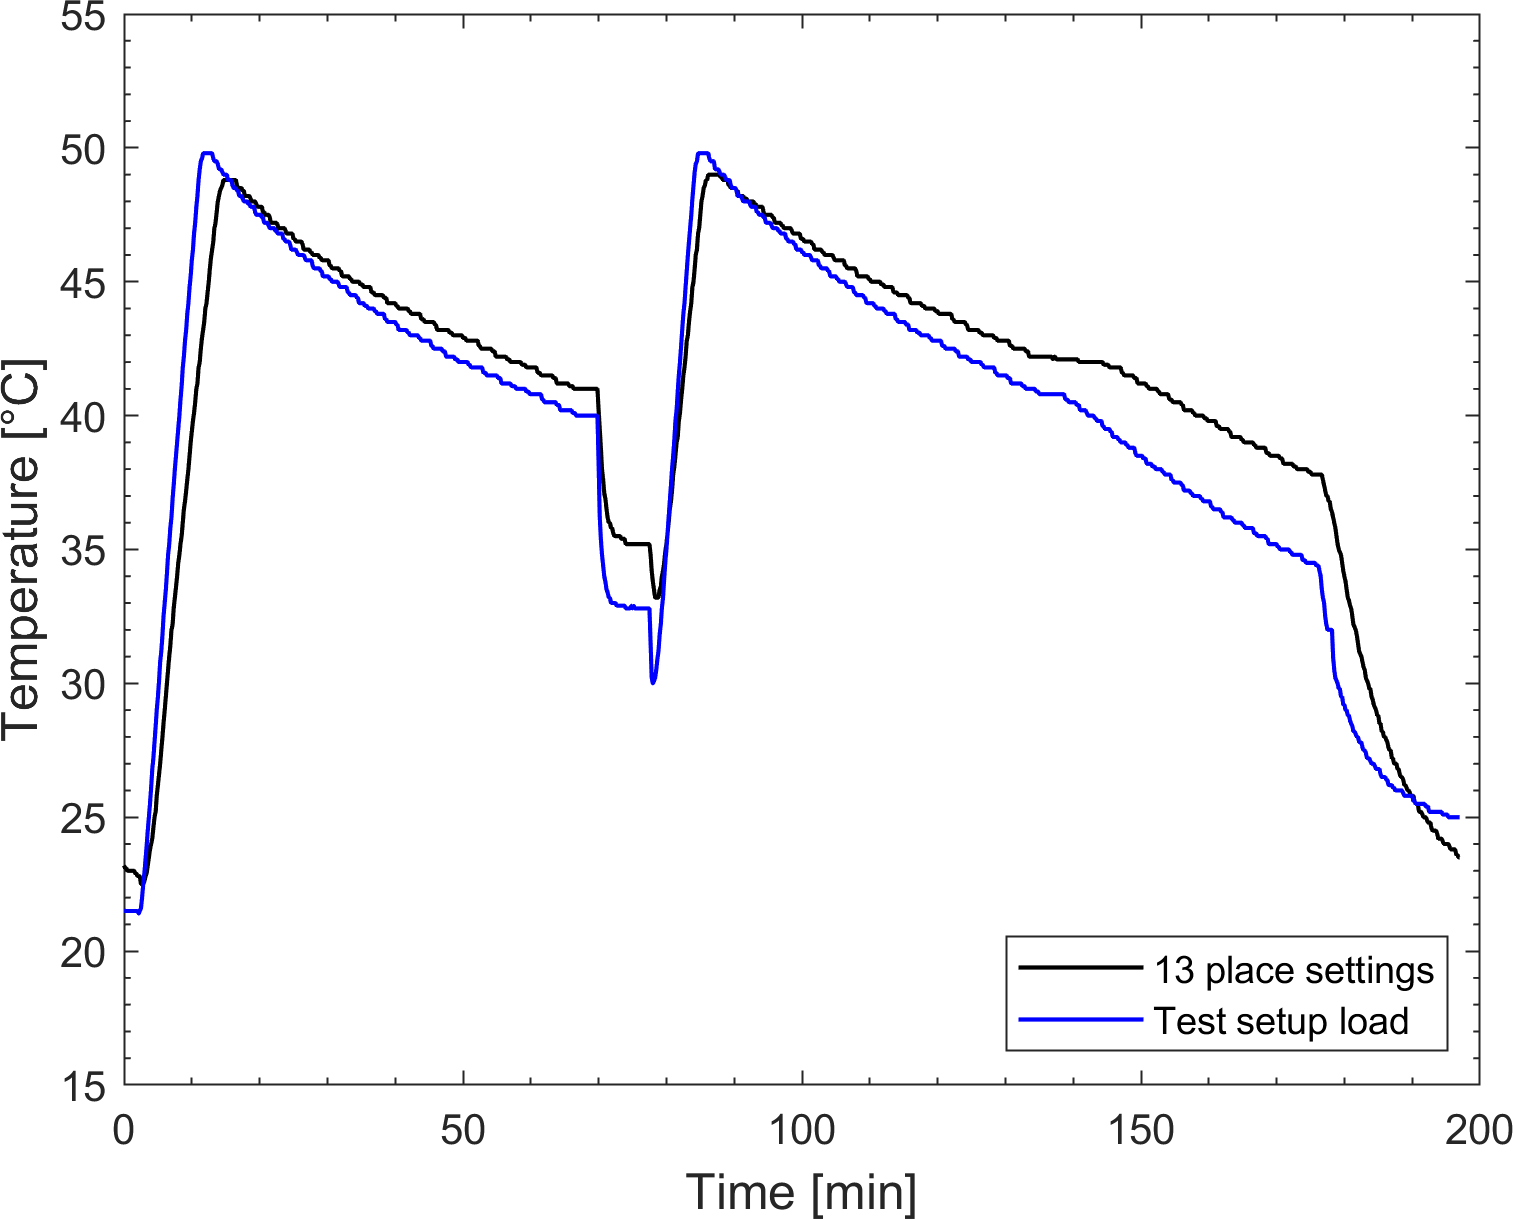

Supplement: Supplementary file 1 [file j_tsd-2024-2589_suppl_002.docx]
