# Supplementary material for: Short and sweet: balancing energy savings and cleaning performance to identify efficient short-cycles for domestic dishwashers
Source: publisher site journal article supplement (doi:10.1515/tsd-2024-2589), 2024-07-08
Supplement: Supplementary file 2 [file j_tsd-2024-2589_suppl_004.docx]

**Supplementary data S4:** **Ingredients of the used market product.**

Trisodium salt of methylglycinediacetic acid

Sodium Carbonate Peroxide

Sodium Carbonate

Aqua

Trideceth-n

PPG/PEG/PPG-3/14.5/16 Propylheptyl Ether

Tetrasodium Etidronate

Sodium Sulfate

Disodium Disilicate

Dipropylene Glycol

TAED

Copolymer of acrylic and sulphonic acids

SODIUM ACRYLATE/SODIUM ACRYLOYLDIMETHYL TAURATE COPOLYMER

Protease

PARFUM

Polyvinyl alcohol

Titanium Dioxide

Disodium Phosphite

Cellulose Gum

Glycerin

zinc hydroxy carbonate

Polyethylene Glycol

Limonene

Benzotriazole

Amylase

Propylene Glycol

Sodium Acetate

Citronellol

Linalool

bis(N,N',N''-trimethyl-1,4,7-triazacyclononane)-trioxo-dimanganese (IV) di(hexafluorophosphate) monohydrate

Colorants
